# Supplementary material
Source: HighWire-hosted journal article supplement (http://bmjopenquality.bmj.com/highwire/filestream/136253/field_highwire_adjunct_files/1/ds6658.docx)

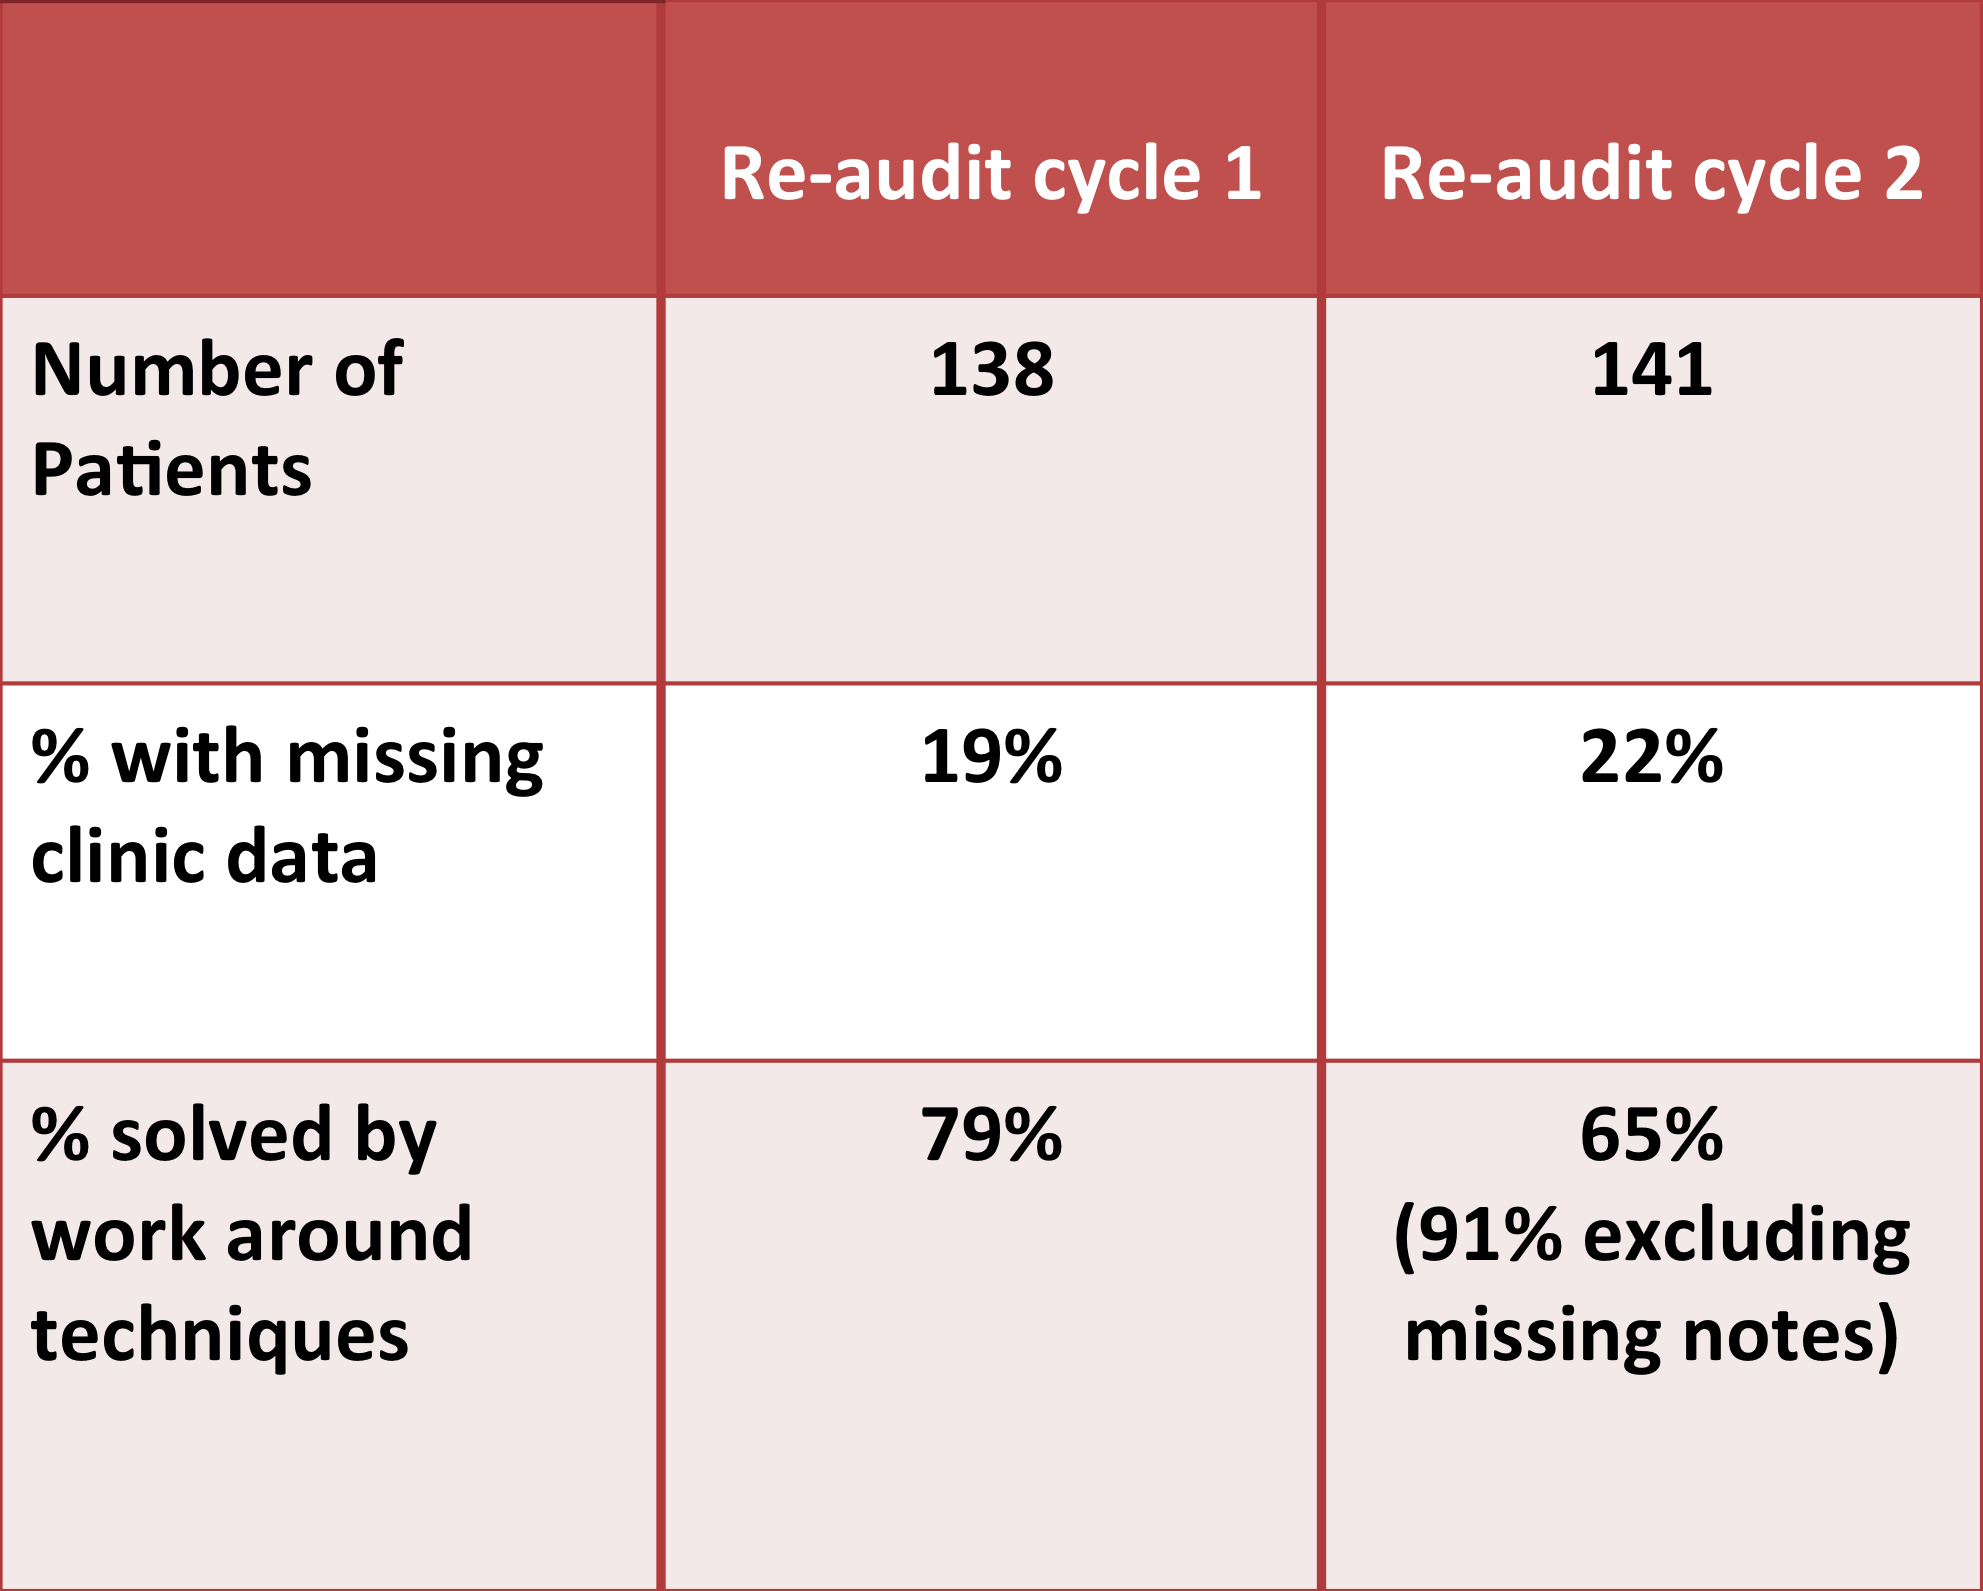


**Figure 3: A table to show results of implicating a work around. Measurement of Improvement.**

Supplement: ds6658.docx [file ds6658.docx]
